# Supplementary material for: Quinone-amine polymers as metal-free and reductant-free catalysts for hydroxylation of benzene to phenol with molecular oxygen
Source: Royal Society of Chemistry journal article supplement (doi:10.1039/c9cc03623g), 2019-01-01
Supplement: c9cc03623g1.pdf [file c9cc03623g1.pdf]

Electronic Supplementary Information (ESI) for:

## Quinone-amine polymer as the metal-free and reductant-free catalyst for hydroxylation of benzene to phenol with molecular oxygen

Weitao Wang,<sup>\*a,b</sup> Hao Tang<sup>a</sup>, Xulu Jiang<sup>a</sup>, Fu-E Huang<sup>a</sup> and Yangmin Ma<sup>\*a,b</sup>

<sup>a</sup> College of Chemistry & Chemical Engineering, Shaanxi University of Science & Technology, Xi'an, Shaanxi, 710021, China.

<sup>b</sup> Shaanxi Key Laboratory of Chemical Additives for Industry, Shaanxi University of Science and Technology, Xi'an, Shaanxi, 710021, China.

E-mail: [wwt1806@163.com](mailto:wwt1806@163.com) (W. Wang), [mym63@sina.com](mailto:mym63@sina.com) (Y. Ma).

### 1. Characterization

Fourier transform infrared spectroscopy (FT-IR) was performed on a VECTOR-22 using the KBr pellet technique with a resolution of 2 cm<sup>-1</sup> from 400 to 4000 cm<sup>-1</sup> and consisted of 32 scans at room temperature. Element analysis (C, H, N) was carried out on Elementar VarioELIII. BET surface area of the catalyst was conducted by the adsorption of N<sub>2</sub> at -196 °C (Gemini VII 2.00, Micromeritics Instrument Corporation). The X-Ray Diffraction (XRD) patterns were obtained by an X-ray diffractometer (Rigaku IV) operated with Cu-K $\alpha$  radiation at 40 kV and 40 mA, scanning mode of 2 theta/theta, scanning type of continuous scanning, and a scanning range from 3° to 90° at a scanning rate of 8 °/min. The X-ray photoelectron spectrometer (XPS) was carried out at 15 kV and 8 mA, with the binding energies calibrated at 284.6 eV from C1s of the adventitious carbon. Asymmetrical XPS peaks were deconvoluted by using the curve-fitting approach with CasaXPS software, as well as by applying Shirley background subtraction and Lorentzian–Gaussian functions (30% L, 70% G). Scanning electron microscope (SEM) for the sample morphology was measured at 20 kV and 15 mA on the Hitachi S-4800. The solid state <sup>13</sup>C NMR was conducted on the Agilent 600M. The GPC was carried out on the Waters1525. The Electron paramagnetic resonance (EPR) spectra were recorded on a Bruker E500 spectrometer.

## 2. Scheme.

### Scheme S1

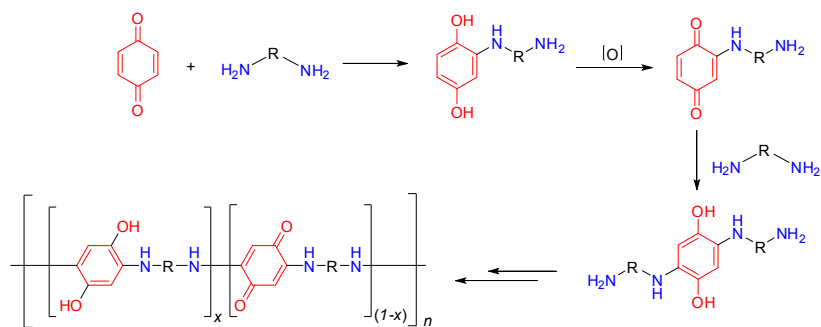

**Scheme S1.** Synthesis of QAPs with benzoquinone and diamine.

### 3. Figures.

**Figure S1**

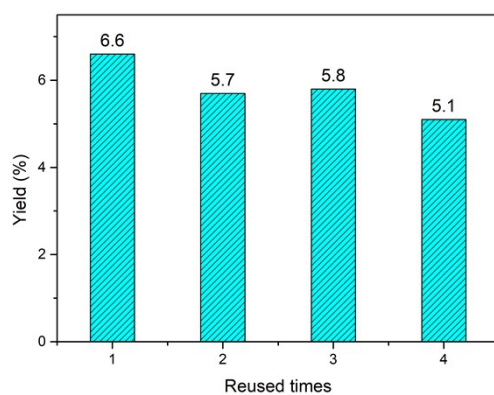

**Fig. S1** The recycle of the QAP (ethylenediamine). Reaction condition: 0.5 mL benzene; 100 mg catalyst; 0.4 LiOAc; 3.0 mL 70%(V/V) acetic acid aqueous solution; temperature, 120 °C; O<sub>2</sub> pressure 2.0 MPa; reaction time, 12 h.

**Figure S2**

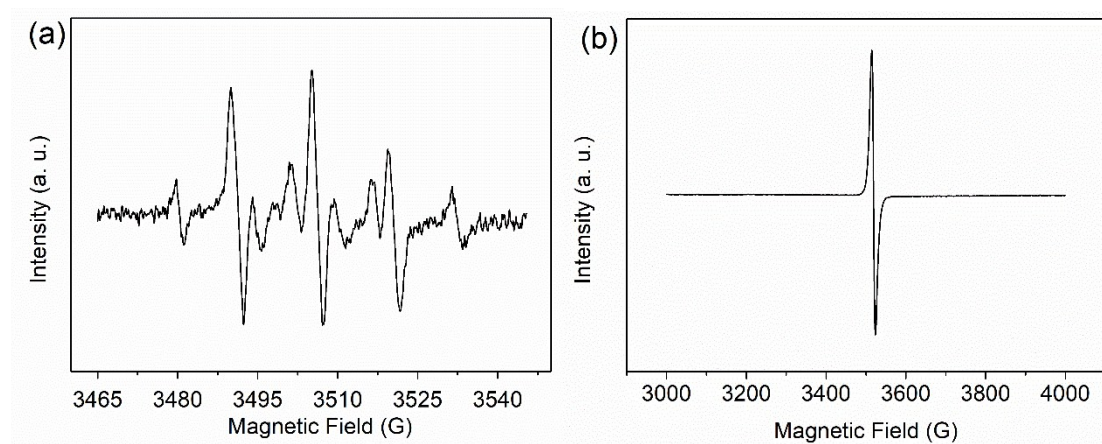

**Fig. S2** The EPR spectra of (a) reaction solution, (b) the solid QAP (ethylenediamine). Reaction condition of (a): 100 mg catalyst; 0.4 LiOAc; DMPO, 0.5 mmol; 3.0 mL 70%(V/V) acetic acid aqueous solution; temperature, 50 °C; O<sub>2</sub> pressure 1 bar; reaction time 5 min.

**Figure S3**

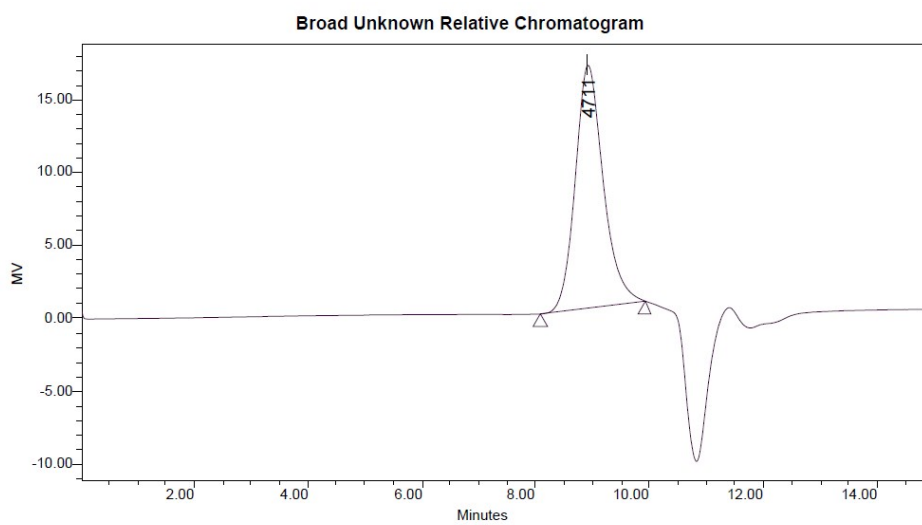

**Broad Unknown Relative Peak Table**

| Distribution Name | Mn (Daltons) | Mw (Daltons) | MP (Daltons) | Mz (Daltons) | Mz+1 (Daltons) | Polydispersity | Mz/Mw    | Mz+1/Mw  |
|-------------------|--------------|--------------|--------------|--------------|----------------|----------------|----------|----------|
| 1                 | 3664         | 4852         | 4711         | 6114         | 7483           | 1.324512       | 1.260061 | 1.542061 |

**Fig. S3** The GPC image and the data of QAP (ethylenediamine).

**Figure S4**

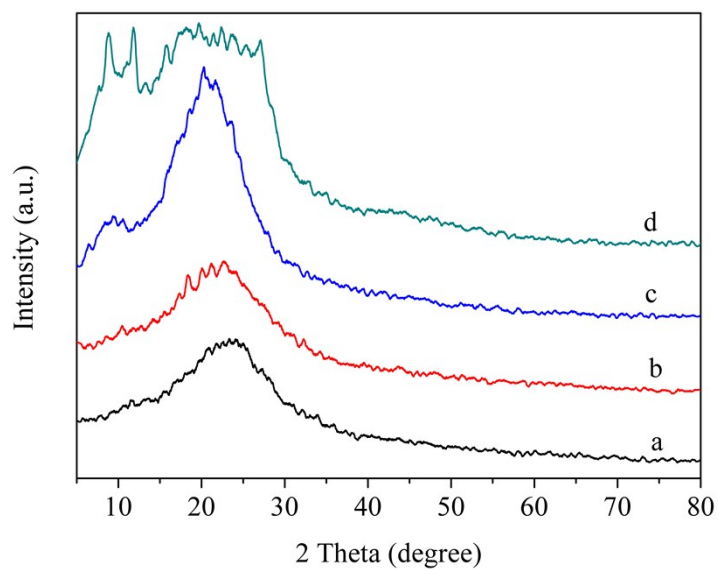

**Fig. S4.** The XRD spectra of different amine based QAP. (a) Ethylenediamine, (b) propanediamine, (c) hexanediamine, (d) *o*-phenylenediamine.

**Figure S5**

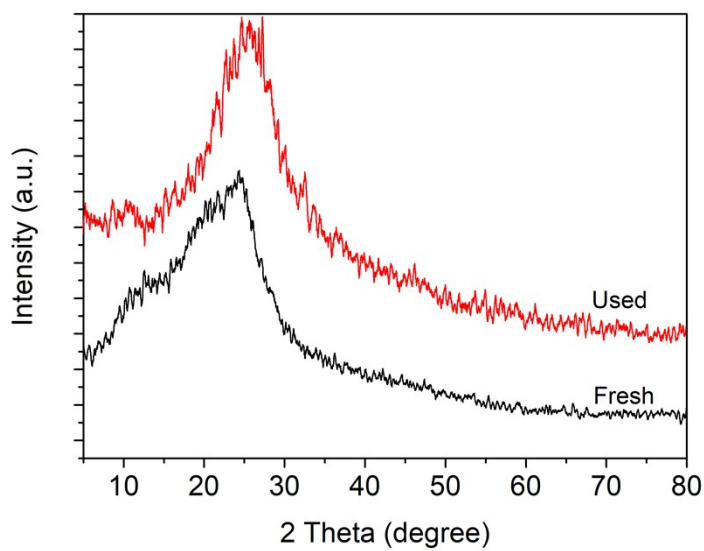

**Fig. S5** The XRD spectra of QAP (ethylenediamine) before and after use..

## Figure S6

There are two kinds of sphere in the QAP. One was an isolated large microsphere; the other was an interconnected smaller sphere.

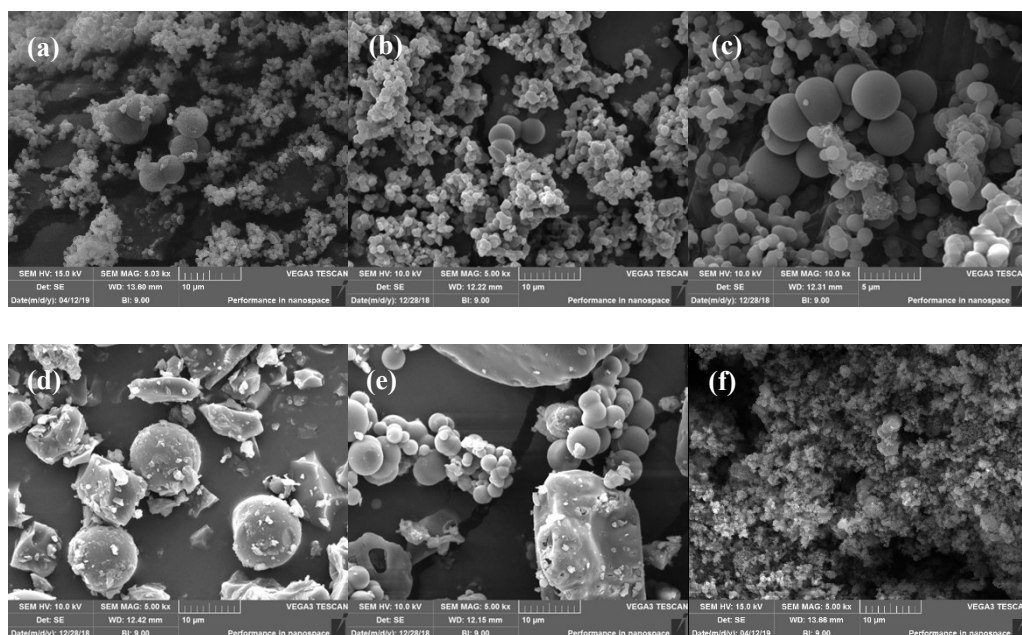

**Fig. S6.** The SEM images of different amine based QAP. (a) Ethylenediamine, (b) propanediamine, (c) hexanediamine, (d) *o*-phenylenediamine, (e) melamine, (f) used catalyst of ethylenediamine based QAP.



**Figure S8**

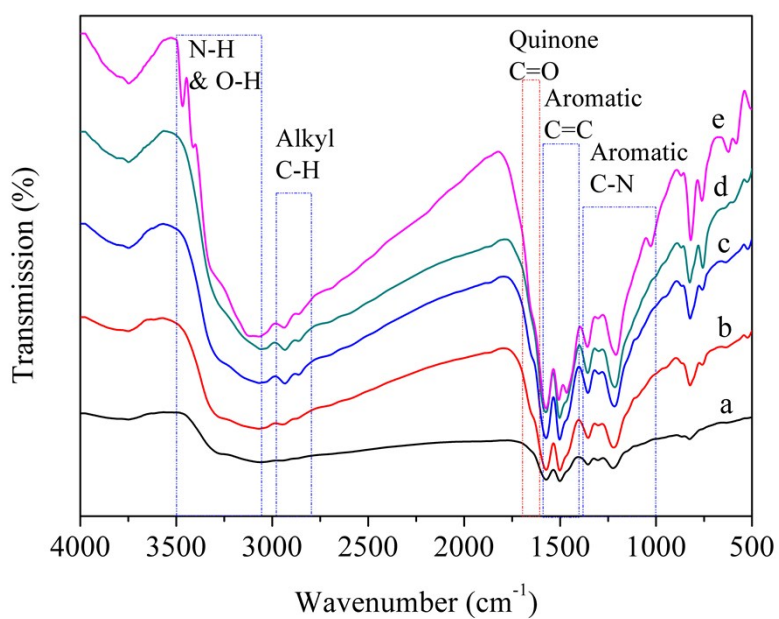

**Fig. S8.** The FT-IR spectra of different amine based QAP. (a) Ethylenediamine, (b) propanediamine, (c) hexanediamine, (d) *o*-phenylenediamine, (e) melamine.

**Figure S9**

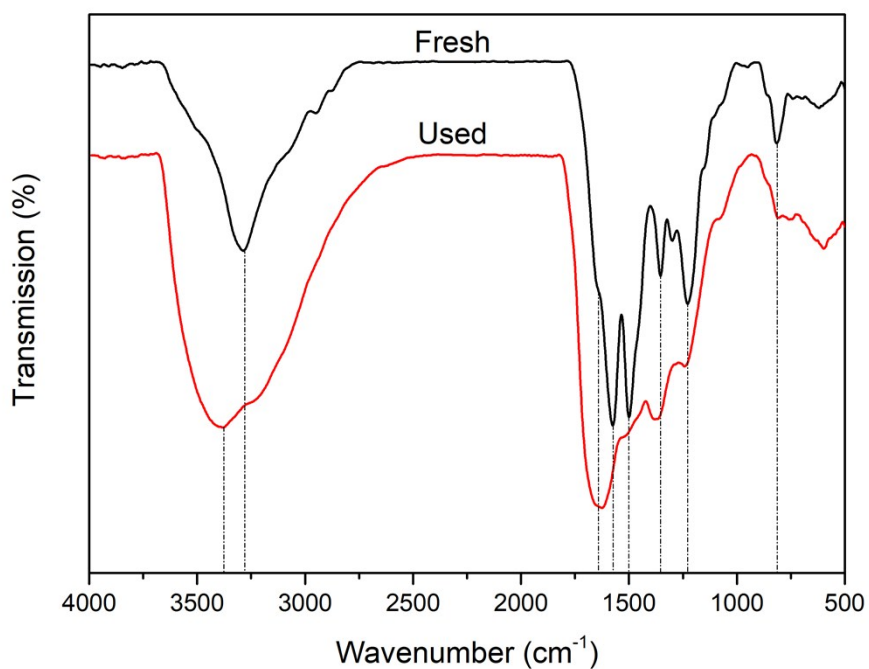

**Fig. S9.** The FT-IR spectra of QAP (ethylenediamine) before and after use.



**Figure S10**

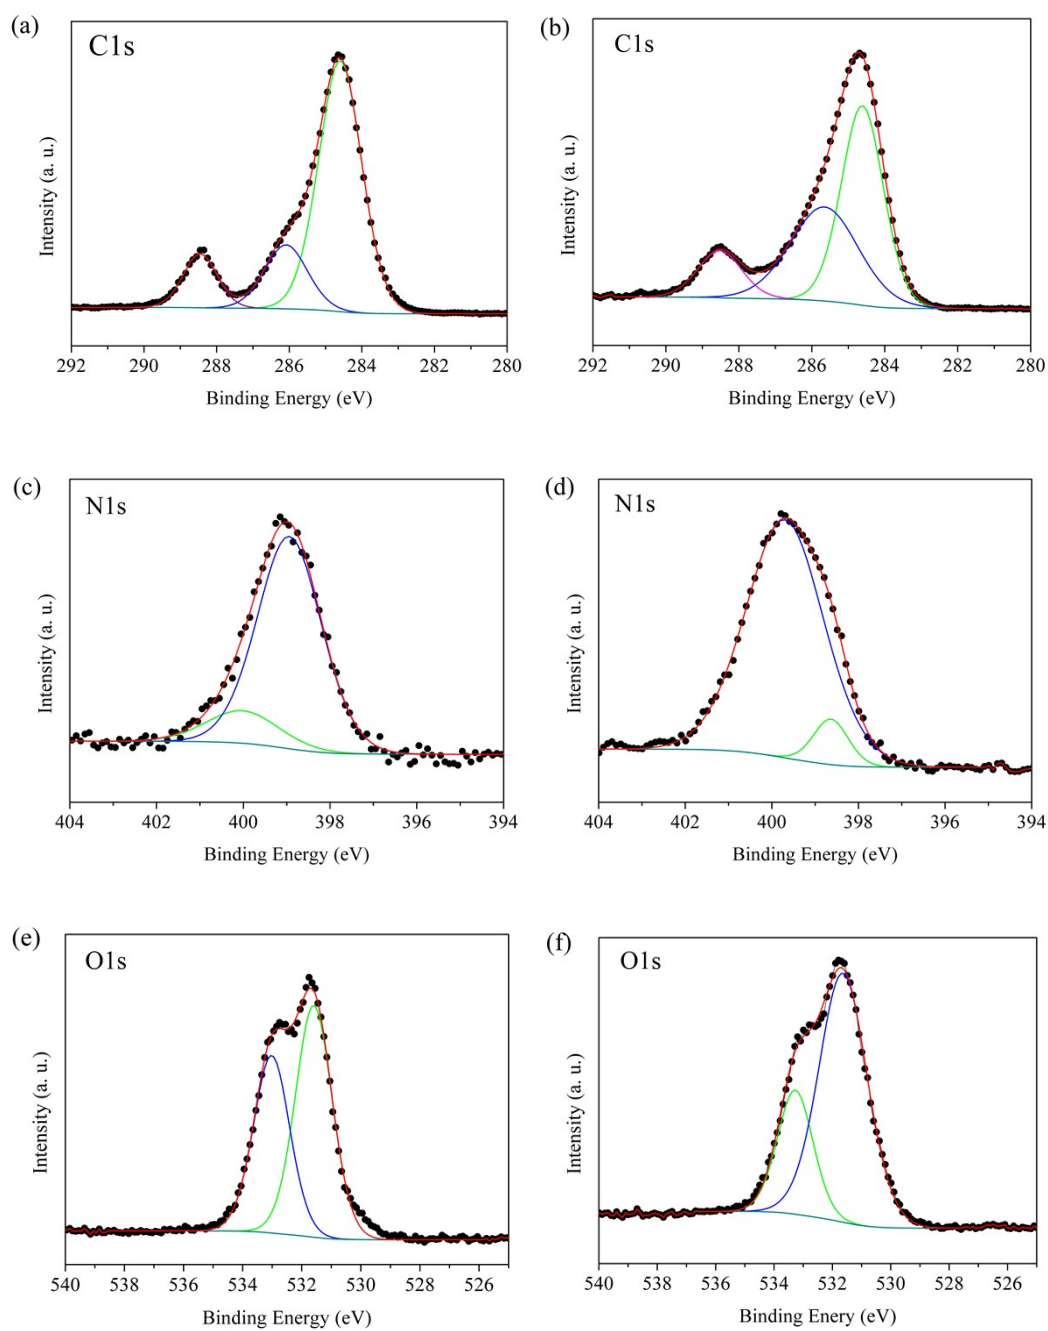

**Fig. 10.** The XPS spectra of ethylenediamine based QAP. (a), (c), and (e) are the fresh QAP. (b), (d), (f) are the used QAP.

**Figure S11**

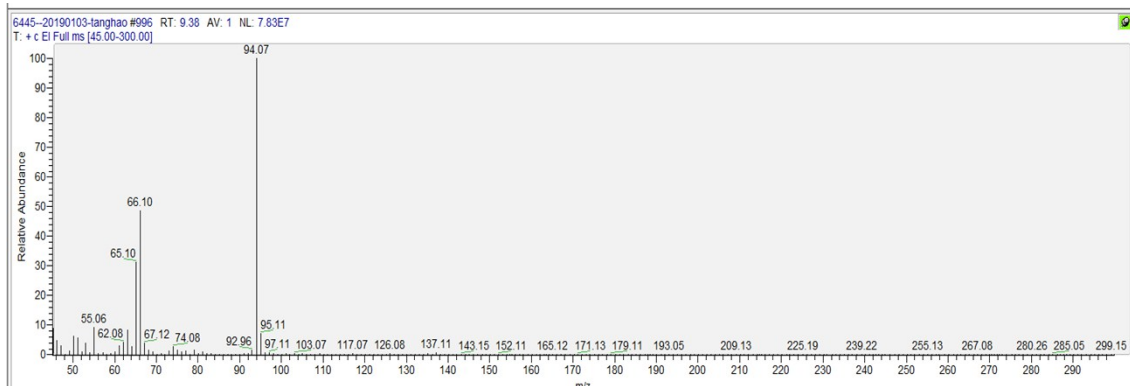

**Fig. S11.** The Mass spectrum of phenol.

## 4. Tables

**Table S1**

**Table S1.** Hydroxylation of benzene to phenol with O<sub>2</sub> on different catalysts.

| Entry | Catalyst                                                                                   | Reducing agent    | Temperature (°C) | Time (h) | Yield (%)         | Ref.      |
|-------|--------------------------------------------------------------------------------------------|-------------------|------------------|----------|-------------------|-----------|
| 1     | V <sub>x</sub> O <sub>y</sub> @C                                                           | Ascorbic acid     | 80               | 24       | 12.2              | 1         |
| 2     | V@CN                                                                                       | Ascorbic acid     | 105              | 11       | 23.0              | 2         |
| 3     | L-Mn-PMoV                                                                                  | Ascorbic acid     | 100              | 10       | 14.4              | 3         |
| 4     | V/SiO <sub>2</sub>                                                                         | Ascorbic acid     | 90               | 10       | 13.7              | 4         |
| 5     | V/NH <sub>2</sub> -SBA-15                                                                  | Ascorbic acid     | 60               | 18       | 13.3              | 5         |
| 6     | CsPMoV <sub>2</sub>                                                                        | Ascorbic acid     | 80               | 24       | 7.2               | 6         |
| 7     | V-N-C-600                                                                                  | Ascorbic acid     | 80               | 24       | 12.6              | 7         |
| 8     | V/UiO-66-NH <sub>2</sub>                                                                   | Ascorbic acid     | 60               | 21       | 22.0              | 8         |
| 9     | H <sub>7</sub> PMo <sub>8</sub> V <sub>4</sub> O <sub>40</sub>                             | CO                | 90               | 15       | 27.3              | 9         |
| 10    | Pd(OAc) <sub>2</sub> +H <sub>5</sub> [PMo <sub>10</sub> V <sub>2</sub> O <sub>40</sub> ]   | None <sup>a</sup> | 100              | 2        | 3.8               | 10        |
| 11    | HMS-HPA(V <sub>2</sub> ) + Pd(OAc) <sub>2</sub>                                            | None <sup>a</sup> | 120              | 10       | 9.2               | 11        |
| 12    | C <sub>3</sub> N <sub>4</sub> -PMoV <sub>2</sub>                                           | None <sup>a</sup> | 130              | 4.5      | 13.6              | 12        |
| 13    | Pd-VO <sub>x</sub>                                                                         | None <sup>a</sup> | 140              | 5        | 5.2               | 13        |
| 14    | [(C <sub>3</sub> CNpy) <sub>2</sub> Pd(OAc) <sub>2</sub> ] <sub>2</sub> HPMoV <sub>2</sub> | None <sup>a</sup> | 120              | 4        | 9.8               | 14        |
| 15    | VOC <sub>2</sub> O <sub>4</sub> -N-5                                                       | None <sup>a</sup> | 150              | 10       | 4.0               | 15        |
| 16    | [DiBimCN] <sub>2</sub> HPMoV <sub>2</sub> @NC-580                                          | None <sup>a</sup> | 140              | 17       | 10.5              | 16        |
| 17    | FeC(5)                                                                                     | None <sup>a</sup> | 150              | 30       | 14.2              | 17        |
| 18    | CH <sub>3</sub> PMoV <sub>2</sub>                                                          | None <sup>a</sup> | 120              | 4.5      | 10.7              | 18        |
| 19    | NOC-0.15                                                                                   | None <sup>a</sup> | 150              | 48       | 12.5 <sup>b</sup> | 19        |
| 20    | Ethylenediamine based QAP                                                                  | None <sup>a</sup> | 120              | 24       | 13.1 <sup>b</sup> | This work |
| 21    | Propanediamine based QAP                                                                   | None <sup>a</sup> | 120              | 12       | 15.9 <sup>b</sup> | This work |
| 22    | Hexanediamine based QAP                                                                    | None <sup>a</sup> | 120              | 12       | 15.0 <sup>b</sup> | This work |

<sup>a</sup> Reductant-free reaction.

<sup>b</sup> Reductant-free and metal-free reaction.

## Table S2

**Table S2** The effect of solvent on the hydroxylation of benzene to phenol <sup>a</sup>

| Entry | Solvents              | Yield (%) |
|-------|-----------------------|-----------|
| 1     | 70% (V/V) acetic acid | 6.7       |
| 2     | Acetonitrile          | –         |
| 3     | PEG-800               | –         |

<sup>a</sup> Reaction condition: 0.5 mL benzene; 100 mg catalyst; 0.4 LiOAc; 3.0 mL solvent; temperature, 120 °C; O<sub>2</sub> pressure 2.0 MPa; reaction time, 12 h.

## Table S3

**Table S3** The controlled experiments on the hydroxylation of benzene to phenol <sup>a</sup>

| Entry | Catalyst               | Yield (%) |
|-------|------------------------|-----------|
| 1     | Hydroquinone           | 10.8      |
| 2     | <i>p</i> -Benzoquinone | 11.7      |

<sup>a</sup> Reaction condition: 0.5 mL benzene; 100 mg catalyst; 0.4 LiOAc; 3.0 mL 70%(V/V) acetic acid aqueous solution; temperature, 120 °C; O<sub>2</sub> pressure 2.0 MPa; reaction time, 12 h.

**Table S4****Table S4** The texture structures of different amines based QAP.

| Catalyst                             | S <sub>BET</sub> (m <sup>2</sup> /g) | V <sub>pore</sub> (cm <sup>3</sup> /g) |
|--------------------------------------|--------------------------------------|----------------------------------------|
| Ethylenediamine based QAP            | 8.2110                               | 0.0472                                 |
| Propanediamine based QAP             | 2.0292                               | 0.0050                                 |
| Hexanediamine based QAP              | 2.6164                               | 0.0125                                 |
| <i>o</i> -Phenylenediamine based QAP | 0.6369                               | 0.0020                                 |
| Melamine based QAP                   | 0.6867                               | 0.0029                                 |

**Table S5****Table S5.** The elemental analysis data of QAP.

| Varied amine based QAP     | N(wt.%) | C(wt.%) | H(wt.%) | O(wt.%) |
|----------------------------|---------|---------|---------|---------|
| Ethylenediamine            | 12.82   | 58.51   | 4.221   | 24.45   |
| Propanediamine             | 9.562   | 62.63   | 4.731   | 23.08   |
| Hexanediamine              | 6.949   | 65.45   | 6.107   | 21.49   |
| <i>o</i> -Phenylenediamine | 11.94   | 68.64   | 3.939   | 15.48   |
| melamine                   | 51.51   | 38.77   | 4.180   | 5.54    |

**Table S6****Table S6.** The Summary of the XPS C1s data of the ethylenediamine based QAP.

|       | Aromatic and aliphatic C |      | C–OH/C=N/C–N        |      | C=O                 |      |
|-------|--------------------------|------|---------------------|------|---------------------|------|
|       | Binding energy (eV)      | At.% | Binding energy (eV) | At.% | Binding energy (eV) | At.% |
| Fresh | 284.6                    | 70.3 | 286.1               | 17.8 | 288.5               | 11.9 |
| Used  | 284.6                    | 49.8 | 285.7               | 38.0 | 288.3               | 12.2 |

**Table S7****Table S7.** The Summary of the XPS O1s data of the ethylenediamine based QAP.

|       | C=O                 |      | C–OH                |      |
|-------|---------------------|------|---------------------|------|
|       | Binding energy (eV) | At.% | Binding energy (eV) | At.% |
| Fresh | 531.6               | 57.0 | 533.0               | 43.0 |
| Used  | 531.6               | 73.1 | 533.3               | 26.9 |

**Table S8****Table S8.** The Summary of the XPS N1s data of the ethylenediamine based QAP.

|       | imine (–N=)         |      | amine (–N–)         |      |
|-------|---------------------|------|---------------------|------|
|       | Binding energy (eV) | At.% | Binding energy (eV) | At.% |
| Fresh | 398.4               | 16.0 | 399.2               | 79.3 |
| Used  | 398.6               | 7.7  | 399.7               | 92.3 |

## 5. References

1. W. Wang, G. Ding, T. Jiang, P. Zhang, T. Wu and B. Han, *Green Chem.*, 2013, **15**, 1150-1154.
2. Y. Li, B. Li, T. Chen, Z. Zhou, J. Wang and J. Huang, *Chinese J. Catal.*, 2015, **36**, 1086-1092.
3. C. Zhou, J. Wang, Y. Leng and H. Ge, *Catal. Lett.*, 2010, **135**, 120-125.
4. C. Guo, W. Du, G. Chen, L. Shi and Q. Sun, *Catal. Commun.*, 2013, **37**, 19-22.
5. Y. Bao, H. Jiang, W. Xing, R. Chen and Y. Fan, *React. Kinet. Mech. Cat.*, 2015, **115**, 535-547.
6. S.-t. Yamaguchi, S. Sumimoto, Y. Ichihashi, S. Nishiyama and S. Tsuruya, *Ind. Eng. Chem. Res.*, 2005, **44**, 1-7.
7. S. Shang, B. Chen, L. Wang, W. Dai, Y. Zhang and S. Gao, *RSC Adv.*, 2015, **5**, 31965-31971.
8. W. Wang, N. Li, H. Tang, Y. Ma and X. Yang, *Mol. Catal.*, 2018, **453**, 113-120.
9. M. Tani, T. Sakamoto, S. Mita, S. Sakaguchi and Y. Ishii, *Angew. Chem. Int. Edit.*, 2005, **44**, 2586-2588.
10. H. A. Burton and I. V. Kozhevnikov, *J. Mol. Catal. A: Chem.*, 2002, **185**, 285-290.
11. Y. Liu, K. Murata and M. Inaba, *J. Mol. Catal. A: Chem.*, 2006, **256**, 247-255.
12. Z. Long, Y. Zhou, G. Chen, W. Ge and J. Wang, *Sci. Rep.*, 2014, **4**, 3651-3651.
13. S. Shang, Y. Hua, J. Li, C. Bo, L. Ying and G. Shuang, *Chempluschem*, 2014, **79**, 680-683.
14. Z. Long, Y. Liu, P. Zhao, Q. Wang, Y. Zhou and J. Wang, *Catal. Commun.*, 2015, **59**, 1-4.
15. G. Luo, X. Lv, X. Wang, S. Yan, X. Gao, J. Xu, H. Ma, Y. Jiao, F. Li and J. Chen, *RSC Adv.*, 2015, **5**, 94164-94170.
16. X. Cai, Q. Wang, Y. Liu, J. Xie, Z. Long, Y. Zhou and J. Wang, *ACS Sustain. Chem. Eng.*, 2016, **4**, 4986-4996.
17. Q. Qin, Y. Liu, W. Shan, W. Hou, K. Wang, X. Ling, Y. Zhou and J. Wang, *Ind. Eng. Chem. Res.*, 2017, **56**, 12289-12296.
18. Z. Long, G. Chen, S. Liu, F. Huang, L. Sun, Z. Qin, Q. Wang, Y. Zhou and J. Wang, *Chem. Eng. J.*, 2018, **334**, 873-881.
19. W. Shan, S. Li, X. Cai, J. Zhu, Y. Zhou and J. Wang, *ChemCatChem*, 2019, **11**, 1076-1085.
